# Supplementary material for: MicroRNA2871b of Dongxiang Wild Rice (Oryza rufipogon Griff.) Negatively Regulates Cold and Salt Stress Tolerance in Transgenic Rice Plants
Source: MDPI journal article supplement (doi:10.3390/ijms241914502), 2023-09-25
Supplement: s1 [file s1]

**Table S1. The primers used in this study**

| Primers                    | Sequence (5'-3')                                       |
|----------------------------|--------------------------------------------------------|
| miR2871b-F                 | ACAGGTACCGTGATCGATATTAAGCCGTATG                        |
| miR2871b-R                 | ACAGTCGACACGTGCTTTCAATGCTTGTG                          |
| HYG-F                      | CGAGAGCCTGACCTATTGCAT                                  |
| HYG-R                      | CTGCTCCATACAAGCCAACCAC                                 |
| Det-miR2871b-F             | TCCCACTATCCTTCGCAAGAC                                  |
| Det-miR2871b-R             | GCCATCACGATGAGGCATGA                                   |
| miR2871b-RT primer         | GTCGTATCCAGTGCAGGGTCCGAGGTATTCGCACTGGATAC<br>GACGTGACC |
| miR2871b-qF                | GCCGCCCTATTTTAGTTTCTAT                                 |
| miR2871b-qR                | GTGCAGGGTCCGAGGT                                       |
| <i>LOC_Os03g41200</i> -qF  | TGTGGGCCGATCGTCAAAAT                                   |
| <i>LOC_Os03g41200</i> -qR  | TGACAATACATCCACACAAAGGA                                |
| <i>LOC_Os07g47620</i> - qF | ACTGCTCCGTCATGATCGTC                                   |
| <i>LOC_Os07g47620</i> - qR | AGAAGCTGCTGCTACCCAAG                                   |
| <i>LOC_Os04g30260</i> - qF | TGATCATTACCGTGGGCGAG                                   |
| <i>LOC_Os04g30260</i> - qR | GTCCATTGAGCGAGTCCACA                                   |
| U6-F                       | CGATAAAATTGGAACGATACAGA                                |
| U6-R                       | ATTTGGACCATTTCTCGATTTGT                                |
| OsActin1-F                 | GTATCCATGAGACTACATACAAC                                |
| OsActin1-R                 | TACTCAGCCTTGGCAATCCACA                                 |
